# Supplementary material
Source: PubMed Central journal article supplement (PMC3896662)
Supplement: supp_jlb.0513297_jlb.0513297SuppData.pdf [file supp_jlb.0513297_jlb.0513297SuppData.pdf]

## S Figure 1

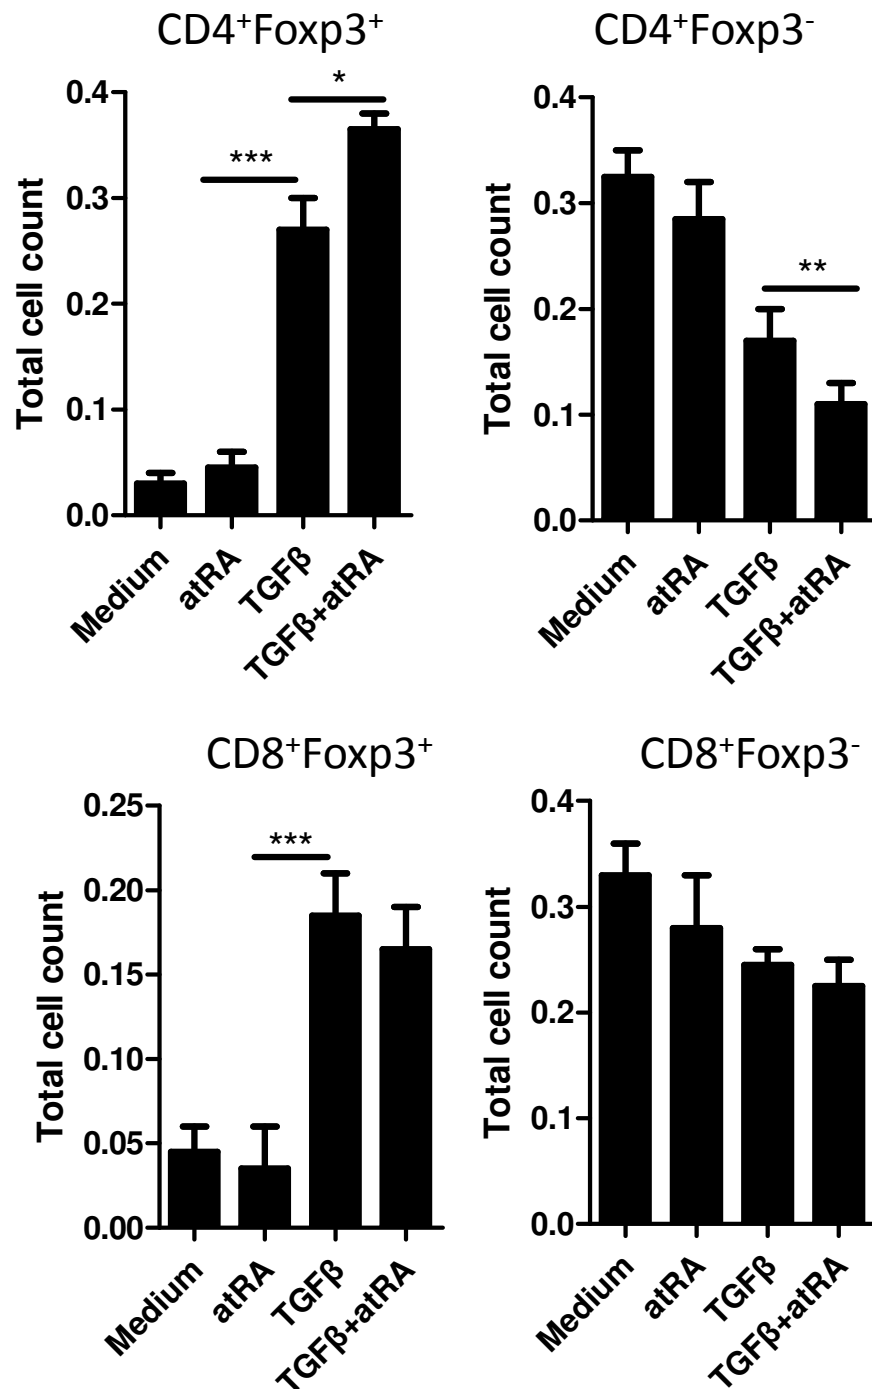

**S figure 1 . atRA enhances total Foxp3+ cells in CD4+ but not in CD8+ cell populations.**  $2 \times 10^5$  CD4+CD62L+CD25-Foxp3-(GFP-) or  $2 \times 10^5$  CD8+CD62L+CD25-Foxp3-(GFP-) cells isolated from C57BL/6 Foxp3<sup>gfp</sup> reporter mice were stimulated with immobilized anti-CD3 (1  $\mu$ g/ml), soluble anti-CD28 (1  $\mu$ g/ml), IL-2 (100 U/ml)  $\pm$  TGF- $\beta$  (2 ng/ml), and with (CD4<sub>TGF $\beta$ +atRA</sub> or CD8<sub>TGF $\beta$ +atRA</sub>) or without atRA (50nM) (CD4<sub>TGF $\beta$</sub>  or CD8<sub>TGF $\beta$</sub> ) for 3 days. Foxp3 (GFP) expression was examined by flow cytometry. The data are summary of three independent experiments showing the total cell number of Foxp3+ and Foxp3- cells from TGF- $\beta$ -primed CD4+ or CD8+ cells ( $\times 10^6$ ), \* p<0.05, \*\* p<0.01, \*\*\* p<0.001, NS, no significance.

## S Figure 2

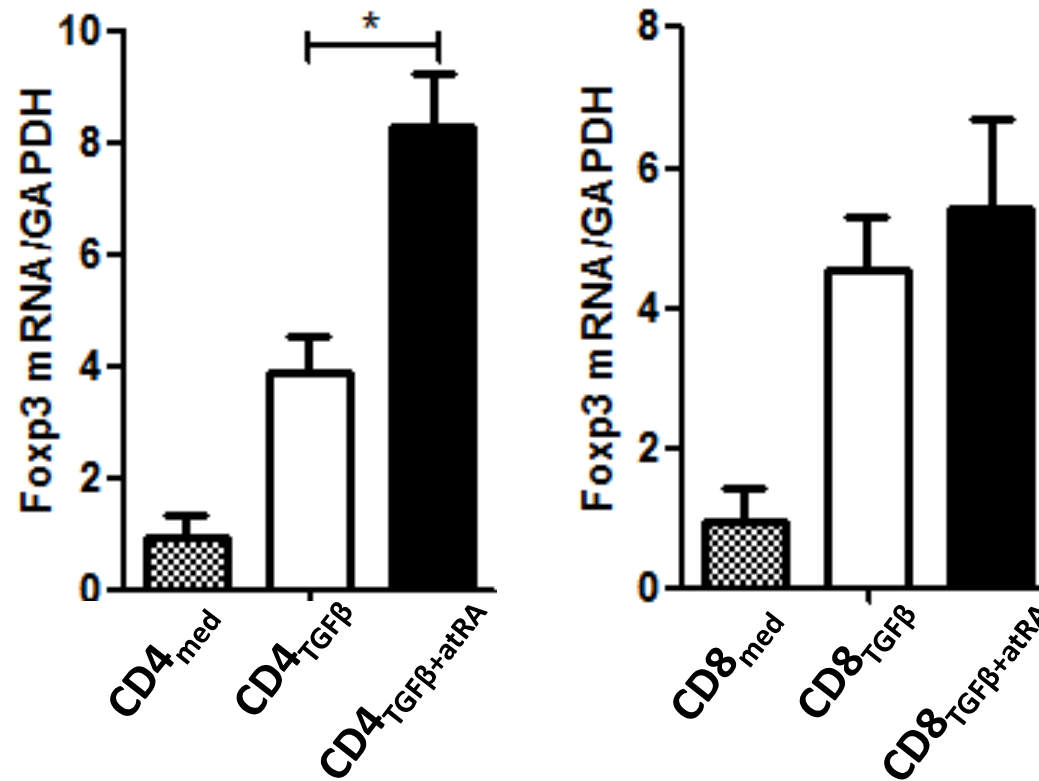

**S Figure 2. atRA enhances Fosp3 mRNA expression on TGF- $\beta$ -primed CD4+ but not on TGF- $\beta$ -primed CD8+ cells.** The cells were isolated and cultured as in Figure 1. The expression of Fosp3 mRNA was determined by quantitative RT-PCR on various CD4+ and CD8+ cells activated with TCR  $\pm$  TGF- $\beta$   $\pm$  atRA. Data are Mean  $\pm$  SEM of three separate experiments. \*  $p < 0.05$ .

## S Figure 3

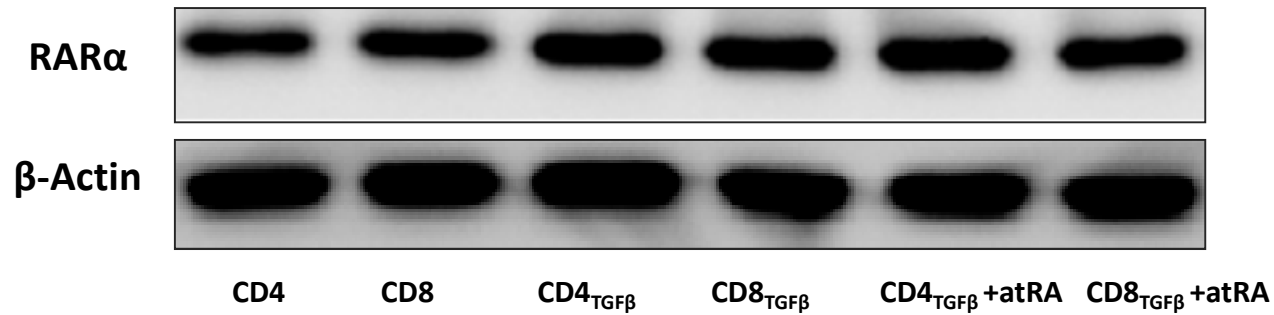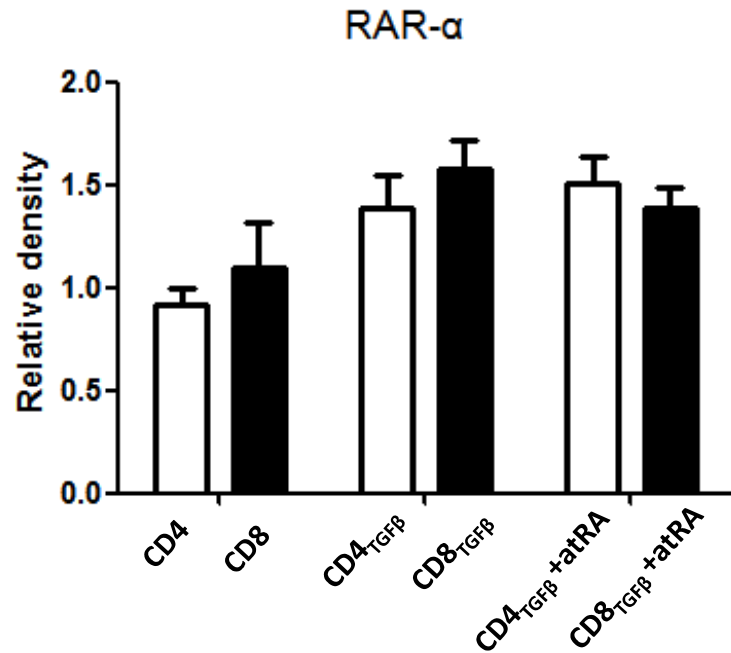

**S Figure 3. Both CD4+ and CD8+ cells similarly express RARα protein.** Naïve or activated CD4+ and CD8+ cells that had been stimulated with TCR ± TGF-β for three days were subjected to Western blot analysis for atRA receptor α chain (RARα) and β-Actin. The levels of RARα were normalized to β-Actin, with the ratio of naïve CD4+ cells being arbitrarily assigned a value of 1. The results shown are representative of the 3 independent experiments (top) and summary of three experiments (mean ± SEM) (bottom).

# S Figure 4

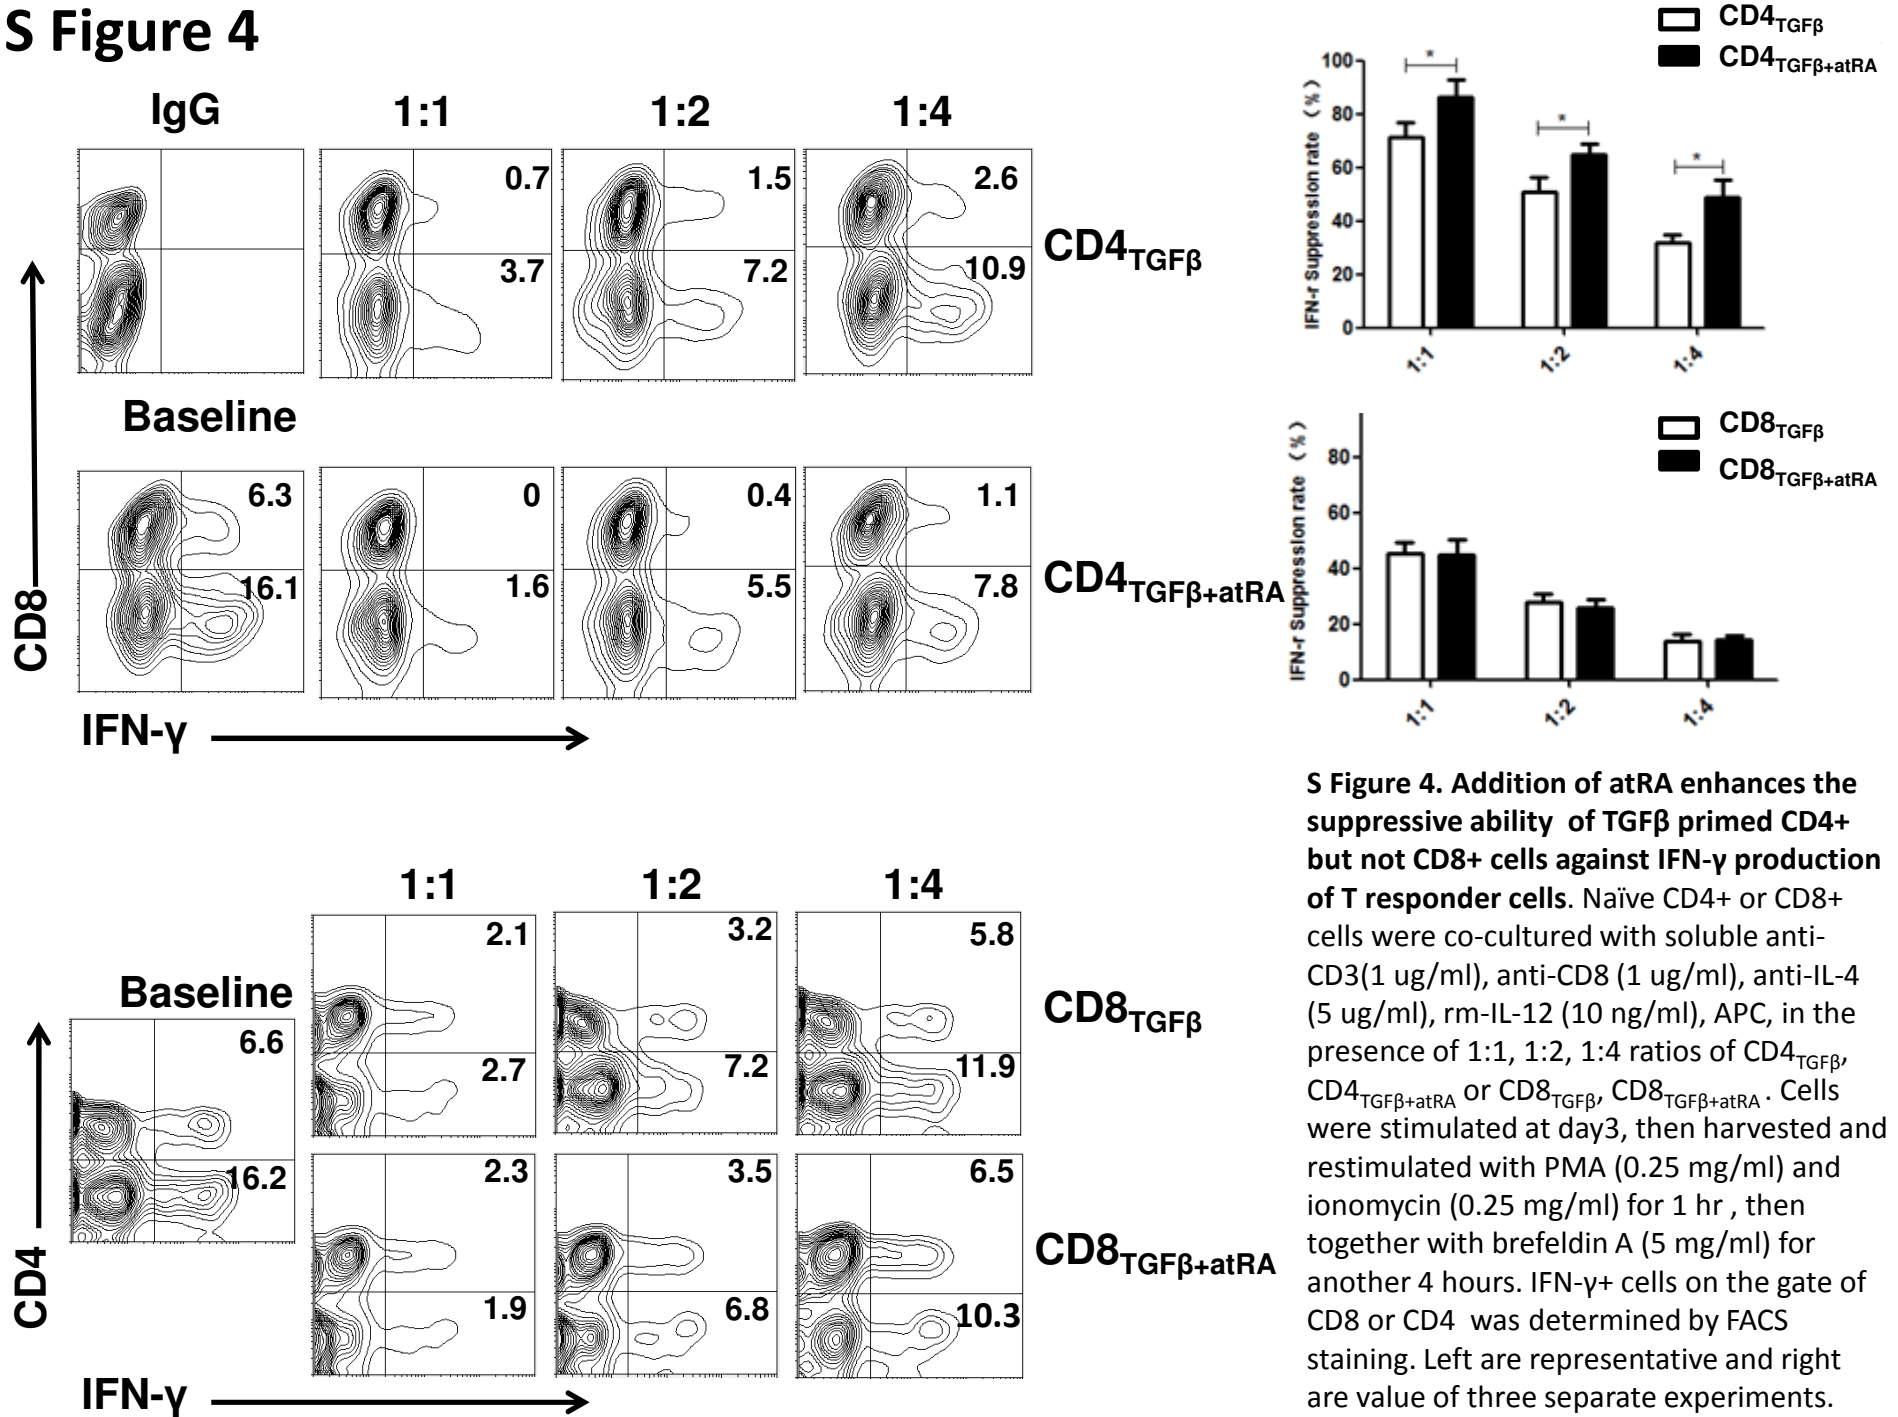

**S Figure 4. Addition of atRA enhances the suppressive ability of TGFβ primed CD4+ but not CD8+ cells against IFN-γ production of T responder cells.** Naïve CD4+ or CD8+ cells were co-cultured with soluble anti-CD3(1 ug/ml), anti-CD8 (1 ug/ml), anti-IL-4 (5 ug/ml), rm-IL-12 (10 ng/ml), APC, in the presence of 1:1, 1:2, 1:4 ratios of CD4<sub>TGFβ</sub>, CD4<sub>TGFβ+atRA</sub> or CD8<sub>TGFβ</sub>, CD8<sub>TGFβ+atRA</sub>. Cells were stimulated at day3, then harvested and restimulated with PMA (0.25 mg/ml) and ionomycin (0.25 mg/ml) for 1 hr, then together with brefeldin A (5 mg/ml) for another 4 hours. IFN-γ+ cells on the gate of CD8 or CD4 was determined by FACS staining. Left are representative and right are value of three separate experiments.
